# Supplementary material for: Efficacy and tolerability of Lavandula angustifolia in treating patients with the diagnosis of depression: a systematic review of randomized controlled trials
Source: publisher site journal article supplement (doi:10.1515/jcim-2020-0498), 2021-08-22
Supplement: Supplementary file 1 [file j_jcim-2020-0498_suppl.docx]

**The reasons for exclusion and excluded citations**

***No diagnosis of interest*** (In each includable study, all individuals in the lavender and control groups should be diagnosed with depression.)

1. Chang, S. Y. (2008). Effects of aroma hand massage on pain, state anxiety and depression in hospice patients with terminal cancer. Journal of Korean Academy of nursing, 38(4), 493-502.

2. Chen, S. L., & Chen, C. H. (2015). Effects of Lavender tea on fatigue, depression, and maternal‐infant attachment in sleep‐disturbed postnatal women. Worldviews on Evidence‐Based Nursing, 12(6), 370-379.

3. Conrad, P., & Adams, C. (2012). The effects of clinical aromatherapy for anxiety and depression in the high risk postpartum woman–a pilot study. Complementary therapies in clinical practice, 18(3), 164-168.

4. Darsareh, F., Taavoni, S., Joolaee, S., & Haghani, H. (2012). Effect of aromatherapy massage on menopausal symptoms: a randomized placebo-controlled clinical trial. Menopause, 19(9), 995-999.

5. Dong, S., & Jacob, T. J. (2016). Combined non-adaptive light and smell stimuli lowered blood pressure, reduced heart rate and reduced negative affect. Physiology & behavior, 156, 94-105.

6. Effati-Daryani, F., Mohammad-Alizadeh-Charandabi, S., Mirghafourvand, M., Taghizadeh, M., & Mohammadi, A. (2015). Effect of lavender cream with or without foot-bath on anxiety, stress and depression in pregnancy: a randomized placebo-controlled trial. Journal of caring sciences, 4(1), 63.

7. Hur, M.-H., Yang, Y. S., & Lee, M. S. (2008). Aromatherapy massage affects menopausal symptoms in Korean climacteric women: a pilot-controlled clinical trial. Evidence-Based Complementary and Alternative Medicine, 5.

8. Jafari-Koulaee, A., Khenarinezhad, F., Sharifi Razavi, A., & Bagheri-Nesami, M. (2019). The Effect of Aromatherapy with Lavender Essence on Depression and Headache Disability in Migraine Patients: A Randomized Clinical Trial. Journal of Medicinal Plants, 2(70), 162-172.

9. Jokar, M., Baradaranfard, F., Khalili, M., & Bakhtiari, S. (2018). The effects of lavender aromatherapy on menopausal symptoms: A single-blind randomized placebo-controlled clinical trial. International Journal of Pharmaceutical Research, 10(4), 182-188.

10. Kianpour, M., Mansouri, A., Mehrabi, T., & Asghari, G. (2016). Effect of lavender scent inhalation on prevention of stress, anxiety and depression in the postpartum period. Iranian journal of nursing and midwifery research, 21(2), 197.

11. Kianpour, M., Moshirenia, F., Kheirabadi, G., Asghari, G., Dehghani, A., & Dehghani-Tafti, A. (2018). The effects of inhalation aromatherapy with rose and lavender at week 38 and postpartum period on postpartum depression in high-risk women referred to selected health centers of Yazd, Iran in 2015. Iranian journal of nursing and midwifery research, 23(5), 395.

12. Kim, M. J., Nam, E. S., & Paik, S. I. (2005). The effects of aromatherapy on pain, depression, and life satisfaction of arthritis patients. Journal of Korean Academy of nursing, 35(1), 186-194.

13. Kuriyama, H., Watanabe, S., Nakaya, T., Shigemori, I., Kita, M., Yoshida, N., . . . Fukui, K. (2005). Immunological and psychological benefits of aromatherapy massage. Evidence-Based Complementary and Alternative Medicine, 2.

14. Lee, I. S., & Lee, G. J. (2006). Effects of lavender aromatherapy on insomnia and depression in women college students. Journal of Korean Academy of nursing, 36(1), 136-143.

15. Lisa Blackburn, M., Sara Achor, B., AD, B. A., Nicole Bauchmire, M., Danielle Dunnington, A., Klisovic, R. B., . . . Tomlinson-Pinkham, K. (2017). The effect of aromatherapy on insomnia and other common symptoms among patients with acute leukemia. Paper presented at the Oncology Nursing Forum.

16. Louis, M., & Kowalski, S. D. (2002). Use of aromatherapy with hospice patients to decrease pain, anxiety, and depression and to promote an increased sense of well-being. American Journal of Hospice and Palliative Medicine®, 19(6), 381-386.

17. Morris, N. (2002). The effects of lavender (Lavendula angustifolium) baths on psychological well-being: two exploratory randomised control trials. Complementary therapies in medicine, 10(4), 223-228.

18. Nasiri Lari, Z., Hajimonfarednejad, M., Riasatian, M., Abolhassanzadeh, Z., Iraji, A., Vojoud, M., . . . Shams, M. (2020). Efficacy of inhaled Lavandula angustifolia Mill. Essential oil on sleep quality, quality of life and metabolic control in patients with diabetes mellitus type II and insomnia.

19. Soden, K., Vincent, K., Craske, S., Lucas, C., & Ashley, S. (2004). A randomized controlled trial of aromatherapy massage in a hospice setting. Palliative medicine, 18(2), 87-92.

20. Uehleke, B., Schaper, S., Dienel, A., Schlaefke, S., & Stange, R. (2012). Phase II trial on the effects of Silexan in patients with neurasthenia, post-traumatic stress disorder or somatization disorder. Phytomedicine, 19(8-9), 665-671.

21. Uzunçakmak, T., & Alkaya, S. A. (2018). Effect of aromatherapy on coping with premenstrual syndrome: A randomized controlled trial. Complementary therapies in medicine, 36, 63-67.

22. Vaziri, F., Sahebkarm, Z., Bahrami, R., Pourahmad, S., & Azima, S. (2018). Lavender Oil Aromatherapy on Infantile Colic and Maternal Mood: A Double Blind Randomized Clinical Trial. Pharmaceutical Sciences, 24(1), 38-43.

23. Zalomonson, S., Freud, T., Punchik, B., Samson, T., Lebedinsky, S., & Press, Y. (2019). The Results of a Crossover Placebo-Controlled Study of the Effect of Lavender Oil on Behavioral and Psychological Symptoms of Dementia. Rejuvenation Research, 22(3), 246-253.

24. Ovayolu, Ö., Seviğ, Ü., Ovayolu, N., & Sevinç, A. (2014). The effect of aromatherapy and massage administered in different ways to women with breast cancer on their symptoms and quality of life. International journal of nursing practice, 20(4), 408-417. (Also, no validated scale for outcome measure)

25. Edge, J. (2003). A pilot study addressing the effect of aromatherapy massage on mood, anxiety and relaxation in adult mental health. Complementary Therapies in Nursing and Midwifery, 9(2), 90-97. (Also, not specifying the oils used for the intervention)

26. Bahrami, T., Rejeh, N., Heravi‐Karimooi, M., Vaismoradi, M., Tadrisi, S. D., & Sieloff, C. (2017). Effect of aromatherapy massage on anxiety, depression, and physiologic parameters in older patients with the acute coronary syndrome: A randomized clinical trial. International journal of nursing practice, 23(6), e12601. (Also, immediate outcome assessment)

27. Graham, P., Browne, L., Cox, H., & Graham, J. (2003). Inhalation aromatherapy during radiotherapy: results of a placebo-controlled double-blind randomized trial. Journal of Clinical Oncology, 21(12), 2372-2376. (Also, immediate outcome assessment)

28. Hongratanaworakit, T. (2011). Aroma-therapeutic effects of massage blended essential oils on humans. Natural Product Communications, 6(8), 1934578X1100600838. (Also, immediate outcome assessment)

29. Imura, M., Misao, H., & Ushijima, H. (2006). The psychological effects of aromatherapy-massage in healthy postpartum mothers. Journal of midwifery & women's health, 51(2), e21-e27. (Also, immediate outcome assessment)

30. Matsumoto, T., Asakura, H., & Hayashi, T. (2013). Does lavender aromatherapy alleviate premenstrual emotional symptoms?: a randomized crossover trial. BioPsychoSocial medicine, 7(1), 12. (Also, immediate outcome assessment)

31. Matsumoto, T., Kimura, T., & Hayashi, T. (2017). Does Japanese citrus fruit yuzu (Citrus junos Sieb. ex Tanaka) fragrance have lavender-like therapeutic effects that alleviate premenstrual emotional symptoms? A single-blind randomized crossover Study. The Journal of Alternative and Complementary Medicine, 23(6), 461-470. (Also, immediate outcome assessment)

32. Moon, S. A., Bae, J., Kim, K., Cho, S. Y., Kwon, G., Lee, R., . . . Moon, C. (2019). Essential oil fragrances positively affect menopausal depressive and anxiety symptoms: An EEG study for mid-life women. IBRO Reports, 6, S189-S190. (Also, immediate outcome assessment)

33. Vaziri, F., Shiravani, M., Najib, F. S., Pourahmad, S., Salehi, A., & Yazdanpanahi, Z. (2017). Effect of lavender oil aroma in the early hours of postpartum period on maternal pains, fatigue, and mood: a randomized clinical trial. International journal of preventive medicine, 8. (Also, immediate outcome assessment)

***No intervention of interest*** (Lavender in the intervention group should not be combined with another medicine, i.e., its effects should be evaluated alone.)

34. Baniya, G. C., Tyagi, A., Huda, M. N., Mishra, D., & Sharma, P. (2013). Comparative efficacy and safety of a herbal preparation along with Shirodhara therapy and fluoxetine in the treatment of major depressive disorder. Paper presented at the INDIAN JOURNAL OF PSYCHIATRY.

35. Firoozeei, T. S., Barekatain, M., Karimi, M., Zargaran, A., Akhondzadeh, S., & Rezaeizadeh, H. (2020). Lavender and dodder combined herbal syrup versus citalopram in major depressive disorder with anxious distress: A double-blind randomized trial. Journal of Integrative Medicine, 18(5), 409-415.

36. Fulzele, A. V., Ingle, N., Huda, M. N., & Mishra, D. S. (2014). Comparative study to evaluate the effect of a herbal preparation & shirodhara in the management of major depressive disorder. International Journal of PharmTech Research, 6, 506-511.

37. Gul, A., Memtily, N., Mijit, P., Imin, M., Rui, H., Wushuer, P., & Talifu, A. (2019). The Üstikuddus sherbiti in the treatment of abnormal cold and dry-type depression patients with comorbid anxiety: A randomized and controlled clinical trial. Traditional Medicine and Modern Medicine, 2(03), 127-133. (Also, measuring the outcome using HAMA)

38. Xiong, M., Li, Y., Tang, P., Zhang, Y., Cao, M., Ni, J., & Xing, M. (2018). Effectiveness of aromatherapy massage and inhalation on symptoms of depression in Chinese community-dwelling older adults. The Journal of Alternative and Complementary Medicine, 24(7), 717-724.

***No outcome of interest*** (studies examining the immediate effects of the intervention were excluded.)

39. Goel, N., & Grasso, D. J. (2004). Olfactory discrimination and transient mood change in young men and women: variation by season, mood state, and time of day. Chronobiology international, 21(4-5), 691-719.

***No design of interest*** (Studies other than randomized controlled trials were excluded.)

40. Fissler, M., & Quante, A. (2014). A case series on the use of lavendula oil capsules in patients suffering from major depressive disorder and symptoms of psychomotor agitation, insomnia and anxiety. Complementary Therapies in Medicine, 22(1), 63-69. doi:10.1016/j.ctim.2013.11.008

41. Itai, T., Amayasu, H., Kuribayashi, M., Kawamura, N., Okada, M., Momose, A., . . . Kaneko, S. (2000). Psychological effects of aromatherapy on chronic hemodialysis patients. Psychiatry and Clinical Neurosciences, 54(4), 393-397. doi:10.1046/j.1440-1819.2000.00727.x
